# Supplementary material for: Profiling the knowledge of female medical/para-medical students, and expertise of health care professionals on female genital schistosomiasis in Anambra, South Eastern Nigeria
Source: PubMed Central journal article supplement (PMC9977039; doi:10.1371/journal.pntd.0011132), 2023-02-16

# PLOS Neglected Tropical Diseases

## Profiling the knowledge of university female students and expertise of health care professionals in the management of female genital schistosomiasis in Anambra, South Eastern Nigeria. --Manuscript Draft--

|                                |                                                                                                                                                                                                                                                                                                                                                                                                                                                                                                                                                                                                                                                                                                                                                                                                                                                                                                                                                                                                                                                                                                                                                                                                                                                                                                                                                                                                                                                                                                                                                                                                                                                                                                                                                                                                                                                                                                                                                                                                                                                                                                                                                                                                                                                                                                                                                                                                                                    |
|--------------------------------|------------------------------------------------------------------------------------------------------------------------------------------------------------------------------------------------------------------------------------------------------------------------------------------------------------------------------------------------------------------------------------------------------------------------------------------------------------------------------------------------------------------------------------------------------------------------------------------------------------------------------------------------------------------------------------------------------------------------------------------------------------------------------------------------------------------------------------------------------------------------------------------------------------------------------------------------------------------------------------------------------------------------------------------------------------------------------------------------------------------------------------------------------------------------------------------------------------------------------------------------------------------------------------------------------------------------------------------------------------------------------------------------------------------------------------------------------------------------------------------------------------------------------------------------------------------------------------------------------------------------------------------------------------------------------------------------------------------------------------------------------------------------------------------------------------------------------------------------------------------------------------------------------------------------------------------------------------------------------------------------------------------------------------------------------------------------------------------------------------------------------------------------------------------------------------------------------------------------------------------------------------------------------------------------------------------------------------------------------------------------------------------------------------------------------------|
| <b>Manuscript Number:</b>      | PNTD-D-22-01326                                                                                                                                                                                                                                                                                                                                                                                                                                                                                                                                                                                                                                                                                                                                                                                                                                                                                                                                                                                                                                                                                                                                                                                                                                                                                                                                                                                                                                                                                                                                                                                                                                                                                                                                                                                                                                                                                                                                                                                                                                                                                                                                                                                                                                                                                                                                                                                                                    |
| <b>Full Title:</b>             | Profiling the knowledge of university female students and expertise of health care professionals in the management of female genital schistosomiasis in Anambra, South Eastern Nigeria.                                                                                                                                                                                                                                                                                                                                                                                                                                                                                                                                                                                                                                                                                                                                                                                                                                                                                                                                                                                                                                                                                                                                                                                                                                                                                                                                                                                                                                                                                                                                                                                                                                                                                                                                                                                                                                                                                                                                                                                                                                                                                                                                                                                                                                            |
| <b>Short Title:</b>            | KAP on schistosomiasis and FGS among students and health care providers                                                                                                                                                                                                                                                                                                                                                                                                                                                                                                                                                                                                                                                                                                                                                                                                                                                                                                                                                                                                                                                                                                                                                                                                                                                                                                                                                                                                                                                                                                                                                                                                                                                                                                                                                                                                                                                                                                                                                                                                                                                                                                                                                                                                                                                                                                                                                            |
| <b>Article Type:</b>           | Research Article                                                                                                                                                                                                                                                                                                                                                                                                                                                                                                                                                                                                                                                                                                                                                                                                                                                                                                                                                                                                                                                                                                                                                                                                                                                                                                                                                                                                                                                                                                                                                                                                                                                                                                                                                                                                                                                                                                                                                                                                                                                                                                                                                                                                                                                                                                                                                                                                                   |
| <b>Keywords:</b>               | Female Genital Schistosomiasis, Nigeria, Capacity Building, Neglected Tropical Diseases, Health care workers                                                                                                                                                                                                                                                                                                                                                                                                                                                                                                                                                                                                                                                                                                                                                                                                                                                                                                                                                                                                                                                                                                                                                                                                                                                                                                                                                                                                                                                                                                                                                                                                                                                                                                                                                                                                                                                                                                                                                                                                                                                                                                                                                                                                                                                                                                                       |
| <b>Abstract:</b>               | <p><b>Background</b></p> <p>Female genital schistosomiasis (FGS) is a largely neglected tropical disease, with little or no attention in the primary health care unit. <b>Toward</b> building momentum to address this challenge, we investigated the perception of university female students about FGS, as well as the expertise of health care professionals in Anambra State, Nigeria.</p> <p><b>Methodology</b></p> <p>We conducted a cross-sectional survey among 587 university female students and 65 health care professionals (HCPs) saddled with the responsibility of delivering care for schistosomiasis-affected persons. Pretested questionnaires were administered to document the awareness and knowledge about the disease. In addition, the expertise of HCPs vis-à-vis suspicion of FGS and management of FGS patients during routine health care service were documented. Data were analyzed in SPSS 20.0, and the confidence interval was set at 95%.</p> <p><b>Results</b></p> <p><del>Over half of the students recruited; 54.2% for schistosomiasis and 58.1% for FGS, were not aware of the disease. However, for HCPs, contrastingly high awareness about schistosomiasis (96.9%), but low awareness about FGS (61.9%) was observed.</del> Knowledge about the transmission route for the disease was significantly poor among HCPs. A considerable proportion (&gt;40%) of the HCPs never suspected schistosomiasis during routine clinical diagnosis of patients who presented probable FGS symptoms (<math>p &lt; 0.05</math>). Similarly, only 28% were certain about the use of praziquantel for treating FGS cases, and about 35%-39% were uncertain of the eligibility criteria and dosage regimens. Commodities for managing FGS were also largely unavailable in about 39% of the health facilities where the HCPs work.</p> <p><b>Conclusion</b></p> <p>Our study has highlighted the significant lack of awareness and knowledge about FGS among university female students and HCPs in Anambra, Nigeria, and the resultant effect on under/misdiagnosis, and lack of treatment for FGS patients. It is therefore important to develop and incorporate FGS training materials in curricula of medical and para-medical university students, and training programs for HCPs during routine schistosomiasis control programs which has a wider coverage of engaged local health workforce.</p> |
| <b>Additional Information:</b> |                                                                                                                                                                                                                                                                                                                                                                                                                                                                                                                                                                                                                                                                                                                                                                                                                                                                                                                                                                                                                                                                                                                                                                                                                                                                                                                                                                                                                                                                                                                                                                                                                                                                                                                                                                                                                                                                                                                                                                                                                                                                                                                                                                                                                                                                                                                                                                                                                                    |
| <b>Question</b>                | <b>Response</b>                                                                                                                                                                                                                                                                                                                                                                                                                                                                                                                                                                                                                                                                                                                                                                                                                                                                                                                                                                                                                                                                                                                                                                                                                                                                                                                                                                                                                                                                                                                                                                                                                                                                                                                                                                                                                                                                                                                                                                                                                                                                                                                                                                                                                                                                                                                                                                                                                    |
| <b>Government Employee</b>     | No - No authors are employees of the U.S. government.                                                                                                                                                                                                                                                                                                                                                                                                                                                                                                                                                                                                                                                                                                                                                                                                                                                                                                                                                                                                                                                                                                                                                                                                                                                                                                                                                                                                                                                                                                                                                                                                                                                                                                                                                                                                                                                                                                                                                                                                                                                                                                                                                                                                                                                                                                                                                                              |

|                                                                                                                                                                                                                                                                                                                                                                                                                                                                                                 |                                                                 |
|-------------------------------------------------------------------------------------------------------------------------------------------------------------------------------------------------------------------------------------------------------------------------------------------------------------------------------------------------------------------------------------------------------------------------------------------------------------------------------------------------|-----------------------------------------------------------------|
| <p>Are you or any of the contributing authors an employee of the United States government?</p> <p>Manuscripts authored by one or more US Government employees are not copyrighted, but are licensed under a <a href="#">CC0 Public Domain Dedication</a>, which allows unlimited distribution and reuse of the article for any lawful purpose. This is a legal requirement for US Government employees.</p> <p>This will be typeset if the manuscript is accepted for publication.</p>          |                                                                 |
| <p><b>Financial Disclosure</b></p> <p>Enter a financial disclosure statement that describes the sources of funding for the work included in this submission and the role the funder(s) played. This includes grants and any commercial funding of the work or authors.</p> <p>This statement will be typeset if the manuscript is accepted for publication.</p> <p>Review the <a href="#">submission guidelines</a> and the instructions link below for detailed requirements and guidance.</p> | <p>Not applicable</p>                                           |
| <p><b>Competing Interests</b></p> <p>On behalf of all authors, disclose any competing interests that could be perceived to bias this work.</p> <p>This statement will be typeset if the manuscript is accepted for publication.</p> <p>Review the instructions link below and PLOS NTDs' <a href="#">competing interests</a> policy to determine what information must be</p>                                                                                                                   | <p>The authors declare that they have no competing interest</p> |

|                                                                                                                                                                                                                                                                                                                                                                                                                                                                                                                                                                                                                |                                                                                                              |
|----------------------------------------------------------------------------------------------------------------------------------------------------------------------------------------------------------------------------------------------------------------------------------------------------------------------------------------------------------------------------------------------------------------------------------------------------------------------------------------------------------------------------------------------------------------------------------------------------------------|--------------------------------------------------------------------------------------------------------------|
| disclosed at submission.                                                                                                                                                                                                                                                                                                                                                                                                                                                                                                                                                                                       |                                                                                                              |
| <p><b>Data Availability</b></p> <p>Provide a <b>Data Availability Statement</b> in the box below. This statement should detail where the data used in this submission can be accessed. This statement will be typeset if the manuscript is accepted for publication.</p> <p>Before publication, authors are required to make all data underlying their findings fully available, without restriction. Review our <a href="#">PLOS Data Policy</a> page for detailed information on this policy. Instructions for writing your Data Availability statement can be accessed via the Instructions link below.</p> | <p>The datasets used and/or analyzed during the current study have been attached as supplementary files.</p> |

1 **Profiling the knowledge of university female students and expertise of health care**  
2 **professionals in the management of female genital schistosomiasis in Anambra, South**  
3 **Eastern Nigeria.**

4

5 Ogechukwu B. Aribodor<sup>1</sup>, Hammed O. Mogaji<sup>2</sup>, Olabanji A. Surakat<sup>3</sup>, Nwadiuto O. Azugo<sup>1</sup>,  
6 Eunice C. Jacob<sup>1</sup>, Emmanuel M. Obikwelu<sup>4</sup>, Obiageli Nebe<sup>5</sup> and Julie Jacobson<sup>6</sup>

7

8 **1** Department of Zoology, Nnamdi Azikiwe University, Awka, Nigeria; **2** Parasitology and  
9 Epidemiology Unit, Department of Animal and Environmental Biology, Federal University  
10 Oye-Ekiti, Nigeria; **3** Department of Zoology, Department of Zoology, Faculty of Basic and  
11 Applied Sciences, Osun State University, Osogbo, Nigeria; **4** Neglected Tropical Diseases  
12 Unit, Anambra State Ministry of Health, Awka, Nigeria; **5** Neglected Tropical Diseases Unit,  
13 Federal Ministry of Health, Nigeria; **6** Bridges to Development, Vashon, Washington

14

15 **Corresponding author:** Ogechukwu Benedicta Aribodor; e-mail address:  
16 og.aribodor@unizik.edu.ng

17

18

19

20

21

22

23

24

25

26 **Abstract**

27 **Background**

28 Female genital schistosomiasis (FGS) is a largely neglected tropical disease, with little or no  
29 attention in the primary health care unit. Toward building momentum to address this  
30 challenge, we investigated the perception of university female students about FGS, as well as  
31 the expertise of health care professionals in Anambra State, Nigeria.

32

33 **Methodology**

34 We conducted a cross-sectional survey among 587 university female students and 65 health  
35 care professionals (HCPs) saddled with the responsibility of delivering care for  
36 schistosomiasis-affected persons. Pretested questionnaires were administered to document the  
37 awareness and knowledge about the disease. In addition, the expertise of HCPs vis-à-vis  
38 suspicion of FGS and management of FGS patients during routine health care service were  
39 documented. Data were analyzed in SPSS 20.0, and the confidence interval was set at 95%.

40

41 **Results**

42 Over half of the students recruited; 54.2% for schistosomiasis and 58.1% for FGS, were not  
43 aware of the disease. However, for HCPs, contrastingly high awareness about schistosomiasis  
44 (96.9%), but low awareness about FGS (61.9%) was observed. Knowledge about the  
45 transmission route for the disease was significantly poor among HCPs. A considerable  
46 proportion (>40%) of the HCPs never suspected schistosomiasis during routine clinical  
47 diagnosis of patients who presented probable FGS symptoms ( $p < 0.05$ ). Similarly, only 28%  
48 were certain about the use of praziquantel for treating FGS cases, and about 35%-39% were  
49 uncertain of the eligibility criteria and dosage regimens. Commodities for managing FGS were  
50 also largely unavailable in about 39% of the health facilities where the HCPs work.

51 **Conclusion**

52 Our study has highlighted the significant lack of awareness and knowledge about FGS among  
53 university female students and HCPs in Anambra, Nigeria, and the resultant effect on  
54 under/misdiagnosis, and lack of treatment for FGS patients. It is therefore important to  
55 develop and incorporate FGS training materials in curricula of medical and para-medical  
56 university students, and training programs for HCPs during routine schistosomiasis control  
57 programs which has a wider coverage of engaged local health workforce.

58

59 **Word count: 323**

60

61

62 **Authors' summary**

63 We investigated the awareness and knowledge of schistosomiasis and Female Genital  
64 Schistosomiasis (FGS) among female students and Health Care Providers (HCPs) in Anambra  
65 State, Nigeria. Our findings shows that majority of the student participants have little  
66 knowledge about the diseases. However, the HCPs had knowledge of schistosomiasis, but  
67 knew very little about FGS. The HCPs also lack the capacity and resources to diagnose and  
68 manage FGS. This significant gap in knowledge, capacity and resources calls for development  
69 of FGS training materials, and its subsequent incorporation in curricula of medical/para-  
70 medical students, and training of HCPs during routine schistosomiasis control programs.

71

72

## 73 **Background**

74

75 Schistosomiasis is one of the most common neglected tropical diseases in the world, with over  
76 206 million people affected, and about 2500 deaths in 2020 [1]. This disease is caused by  
77 parasitic water-borne trematodes of the genus *Schistosoma*, and over 90% of those affected  
78 reside in Africa. Two major *Schistosoma* species are common in **this** region; *S. mansoni* and  
79 *S. haematobium*, with the former and latter causing intestinal and urogenital schistosomiasis  
80 respectively [2]. The pathologies associated with both species vary depending on several  
81 factors, which are not limited to the severity of infection, migration of the worms through the  
82 organs and body tissues, and inflammatory responses to the presence of the eggs laid by the  
83 adult worms [3]. Intestinal schistosomiasis can result in symptoms such as abdominal pain,  
84 diarrhoea, blood in the stool, and in more severe cases, enlargement of the liver and spleen, a  
85 condition known as hepatosplenomegaly [3][4]. However, hematuria, which is classified as  
86 the passage of visible or invisible blood in urine is a common symptom of urogenital  
87 schistosomiasis [3]. Other complicated pathologies of urogenital schistosomiasis may include  
88 fibrosis of the bladder and ureter, kidney damage, and in more advanced cases cancer of the  
89 bladder [3]. Urogenital schistosomiasis may become more complex in females in a condition  
90 known as Female Genital Schistosomiasis (FGS).

91

92 FGS is a clinical condition used to describe the presence of trapped *S. haematobium* eggs,  
93 DNA, or characteristic clinical changes specifically in the genital tract of affected women,  
94 regardless of whether or not, the eggs are present in the urinary tract **[5][6]**. Many women  
95 acquire *S. haematobium* infection in childhood during domestic and recreational activities at  
96 infested water bodies, and about 75% of them may develop FGS **[5][7]**. Clinical  
97 manifestations such as vaginal bleeding, discharge, hematuria, dysuria, dyspareunia, and post-

98 coital bleeding are partly caused by trapped eggs which damage the genital mucosal linings  
99 with their characteristic terminal spine, and majorly the inflammatory responses to the  
100 embedded eggs [8]. This situation makes those affected more susceptible to HIV and Human  
101 Papillomavirus infections [9]. In addition, blockage of the uterus and/or fallopian tubes by the  
102 eggs or inflammatory responses to the egg may result in fertility problems. In adult females,  
103 eggs are commonly trapped in the cervix, vagina, and vulva, while vulvar lesions are common  
104 in younger females [5][6][10][11]. FGS lesions may present themselves as grainy sandy  
105 patches [6], **homogenous yellow sandy patches** [5], and rubbery papules.

106

107 As of 2020, there has been no assessment of FGS by the Global Burden of Disease study,  
108 either as a single entity or as part of the burden of schistosomiasis [12]. However, based on  
109 isolated reports, it is estimated that FGS affects about 56 million women and girls in Africa,  
110 and about 20 to 150 million females of all ages are estimated to be at risk of infection [13].  
111 Interestingly, **foreigners** who visit infested freshwater bodies are also at risk [14]. In West  
112 Africa, Nigeria bears the highest burden of schistosomiasis, and invariably FGS. However,  
113 only two isolated studies in Ogun [15] and Anambra [16] have investigated the prevalence of  
114 FGS in Nigeria. These studies were conducted in rural areas with **accommodating** ecological  
115 conditions that tend to promote infections with schistosomiasis [15,16]. Interestingly, the  
116 preliminary findings from both states have spurred the interest of healthcare professionals and  
117 researchers to understand the epidemiology of FGS **and also develop protocols aimed at**  
118 **highlighting other regions in the country where FGS is particularly endemic.** This interest has  
119 been accompanied by investment from Bridges to Development through capacity building of  
120 health care professionals. Currently, FGS is largely neglected in the training curricula of  
121 medical and para-medical university students who subsequently transform into healthcare  
122 professionals. **These gaps in training** had contributed to **misdiagnosis/classification of clinical**



123 manifestations due to FGS, hence resulting in stigmatization, mental stress, and social  
124 exclusion of young females. This study, therefore, investigated the ~~perception of university~~  
125 ~~students about FGS, as well as the expertise of health care professionals saddled with the~~  
126 ~~responsibility of delivering health care services to those affected by FGS~~ in Anambra State,  
127 Nigeria. We believe our findings would be useful during consultation meetings as  
128 deliberations and strategies towards controlling FGS are mapped out in the state, and Nigeria  
129 at large.

130

## 131 **Methodology**

132

### 133 **Ethics Statement and considerations**

134 This study received ethical approval (COOUTH/CMAC/ETH.C/Vol.1/FN:04/0117) from the  
135 ethical review board of the Anambra State-owned Chukwuemeka Odumegwu Ojukwu  
136 University Teaching Hospital in Awka. Consent was sought from study participants who were  
137 prior to data collection. Written informed consent was obtained from study participants as  
138 applicable, and unique identifiers and a password-protected database were used to ensure  
139 anonymity and confidentiality through the study procedures.

140

### 141 **Study area**

142 Anambra is one of the 37 states in Nigeria, located in the southeastern part of the country,  
143 with 21 administrative regions known as local government areas (LGAs) (Fig 1). By  
144 population estimate, Anambra is ranked the 8<sup>th</sup> most populated state, with over 40% of its  
145 population living in rural areas where arable soil, tropical rain forest, topography, lakes, and  
146 river favors both farming/ fishing activities, as well as the transmission of schistosomiasis.  
147 Generally, the healthcare centers in rural areas lack trained healthcare personnel, are poorly

148 equipped, and with none or below standard laboratories which indicates an absence of public  
149 health outreaches and implementation of effective health outcomes.

150

151 *Fig 1: Map of Nigeria showing Anambra State*

152

### 153 **Study design, mobilization, recruitment of study participants, and data collection**

154 This study was cross-sectional in design, involving the use of quantitative methods to assess  
155 the perception and challenges of undergraduate students and health workers respectively.  
156 Following the guidelines of Bridges to Development and The Geneva Learning Foundation  
157 on the FGS Accelerated Scale Together (FAST) Package, an online questionnaire was  
158 developed during the First Scholar Workshop on Female Genital Schistosomiasis (FGS) and  
159 the First FGS Impact Accelerator meeting held between May and October 2021.

160

161 Upon completion and pilot testing of the questionnaire, the lockdown orders during the  
162 COVID-19 pandemic prevented physical interactions, as such, we administered the pretested  
163 electronic questionnaires to female students who are actively enrolled with the Nnamdi  
164 Azikiwe University in Awka. This prominent university has attracted residents living in rural  
165 areas across the LGAs in the State to migrate to Awka and other neighboring cities for  
166 educational and occupational-related activities. Females were invited to participate in the  
167 study through personal invitation letters sent to their institutional email, while WhatsApp  
168 broadcast messages, Facebook postings, and Telegram platforms were also utilized. An  
169 electronic packet containing a brief introductory note about the project, a question to seek  
170 consent, and a questionnaire were sent across the platforms. Only submissions of those who  
171 completed the consent questionnaire were included in the final analysis. Furthermore, health  
172 workers were interviewed physically during one of the routine stakeholder meetings for the

173 elimination of NTDs in Anambra State. Questionnaires were self-administered before the  
174 commencement of the stakeholders' meeting. Considering the literacy status of the  
175 participants, all electronic tools were designed and administered in the English language.

176

### 177 **Data Management and Analysis**

178 Data collected were imported into SPSS 20.0 statistical software (SPSS, USA) for analysis.  
179 Descriptive statistics such as frequencies and percentages were used to summarize and present  
180 the proportions of background and socio-demographic characteristics of the respondents. Chi-  
181 square tests were used to examine differences between variables of interest, with a significant  
182 level set at 95%.

183

### 184 **Result**

#### 185 **Demographic characteristics of the study participants**

186 A total of 650; 587 university students and 65 healthcare professionals participated in this  
187 study. The majority of the female students (59%) were within the age category 20-24 years,  
188 followed by those between the age category 15 and 19 years. About 74% of them were from  
189 households that earn above the minimum national income of \$50 per month. On the other  
190 hand, about 52% of the healthcare professionals recruited were females and 48% were males.  
191 About 56% of them were within the age category of 25 -45 years. Eight different fields of  
192 medical practice were represented, with a majority of the practitioners being medical doctors  
193 (36.9%), followed by laboratory scientists (21.5%), and community health workers (10.8%).  
194 Other specialization includes researcher, nurse, pharmacist, public health officer, and  
195 radiographer. About half of the practitioners have spent less than a decade in their current  
196 position, and about 87% of them work in a government-owned facility. However, only 46%  
197 of them have had experience with pelvic examination before (Table 1).

198 **Table 1: Demographic characteristics of the study participants**

|                                        | Frequency | %    |
|----------------------------------------|-----------|------|
| <b>Female students (n=587)</b>         |           |      |
| <b>Age category (in years)</b>         |           |      |
| 15-19                                  | 182       | 31   |
| 20-24                                  | 345       | 58.8 |
| 25-29                                  | 56        | 9.5  |
| >30                                    | 4         | 0.7  |
| <b>Average household income</b>        |           |      |
| <50\$                                  | 148       | 25.2 |
| >50\$                                  | 433       | 73.8 |
| Undefined                              | 6         | 1.0  |
| <b>Healthcare professionals (n=65)</b> |           |      |
| <b>Gender</b>                          |           |      |
| Male                                   | 31        | 47.7 |
| Female                                 | 34        | 52.3 |
| <b>Age category (in years)</b>         |           |      |
| 20-24                                  | 7         | 10.8 |
| 25-29                                  | 14        | 21.5 |
| 30-34                                  | 7         | 10.8 |
| 35-39                                  | 7         | 10.8 |
| 40-44                                  | 11        | 16.9 |
| 45-49                                  | 7         | 10.8 |
| >50                                    | 12        | 18.5 |
| <b>Years of practice</b>               |           |      |
| <10                                    | 34        | 52.3 |
| 11-20                                  | 15        | 23.1 |
| 21-30                                  | 10        | 15.4 |
| 31-40                                  | 1         | 1.5  |
| 41-50                                  | 1         | 1.5  |
| No response                            | 4         | 6.2  |
| <b>Specialization</b>                  |           |      |

|                                     |    |      |
|-------------------------------------|----|------|
| Researcher [Academic]               | 3  | 4.6  |
| Researcher [Clinical]               | 2  | 3.1  |
| Community Health Worker             | 7  | 10.8 |
| Laboratory Scientist                | 14 | 21.5 |
| Medical Doctor                      | 24 | 36.9 |
| Nurse                               | 5  | 7.6  |
| Pharmacist                          | 4  | 6.2  |
| Public health officer               | 5  | 7.7  |
| Radiographer                        | 1  | 1.5  |
| <b>Type of establishment</b>        |    |      |
| Government-owned                    | 57 | 87.7 |
| Private                             | 8  | 12.3 |
| <b>Conduct pelvic examinations?</b> |    |      |
| <b>Yes</b>                          | 30 | 46.2 |
| <b>No</b>                           | 35 | 53.8 |

199

200

201 **Awareness about schistosomiasis and FGS among female students.**

202 Of the 587 students interviewed, about half of them 318 (54.2%) affirmed they have heard of  
 203 schistosomiasis. A majority reported their source of information was from the school  
 204 environment 208 (65.6%), followed by social media 69 (21.8%), friends and family 26(8.2%),  
 205 and through schistosomiasis, MDA campaigns 13 (4.1%). (Fig 2). However, when asked  
 206 about FGS, only 246 (41.9%) of the participants have heard about the clinical condition.

207 Among those that have heard, their source of information was from the school environment  
 208 132 (53.7%), followed by social media 66 (26.8%), friend and family 27 (11%) and through  
 209 female genital schistosomiasis campaigns 17 (6.9%). (Fig 2).

210 **Figure 2: Awareness of schistosomiasis and FGS among university students**

211

212

213 **Knowledge of health care professionals about schistosomiasis and FGS.**

214 Of the 65 practitioners interviewed, 63 (96.9%) of them affirmed they have heard of  
215 schistosomiasis. The majority of these respondents 40 (63.5%) explained that it is a water-  
216 borne disease, followed by 17 (26.9%), who claimed it is transmitted by vectors. Other  
217 respondents claimed it can be transmitted through the fecal-oral pathway, 7 (11.1%) and  
218 person-to-person contact, (1, 1.5%). Only one respondent reported that it is caused by  
219 cercariae penetrating the skin of a susceptible host (Fig 3a). However, when asked about FGS,  
220 only 40 (61.9%) of the participants know about the disease. The majority of these respondents  
221 32 (80%) explained that it is a water-borne disease, followed by sexual intercourse (13,  
222 32.5%) and 11 (27.5%), who claimed it is a disease transmitted by vectors. Other respondents  
223 claimed it can be transmitted through the fecal-oral pathway, 4 (10%) and person-to-person  
224 contact, (1, 2.5%). Only one respondent reported that it is caused by the cercariae penetrating  
225 the skin of a susceptible host which later gets to the genitals (Fig 3).

226

227 *Figure 3: Knowledge of health care professionals about schistosomiasis and FGS.*

228

229 **Prevalence of schistosomiasis suspicion among practitioners during routine practice.**

230 Of the 65 practitioners interviewed, 41 (63.1%) of them provide patient-based care to people  
231 with venereal diseases, significant lower abdominal pain, and hematuria, respectively.  
232 However, 33 (50.8%) of them have provided care to patients presenting dysuria. **The majority**  
233 **of the practitioners reported suspecting schistosomiasis infection during their diagnosis, with**  
234 **the majority of the suspicion attributed to patients who present with dysuria (60.6%),**  
235 **hematuria (58.5%), significant lower abdominal pain (56.1%) and venereal diseases (53.7%).**  
236 Almost 90% of the practitioners who provide care for patients with venereal diseases have  
237 used praziquantel as a drug of choice when they suspect schistosomiasis. There were

238 significant differences in the proportions reported for schistosomiasis suspicion across the  
 239 different types of diseases treated ( $p < 0.05$ ) (Table 2).

240 **Table 2:** Prevalence of schistosomiasis suspicion among practitioners during routine  
 241 practice.

|                                             | NT       | Suspect a possible schistosomiasis infection in your diagnosis |          |        | p-value |
|---------------------------------------------|----------|----------------------------------------------------------------|----------|--------|---------|
|                                             |          | Yes                                                            | No       | NA     |         |
| <b>Practitioners who treat; (N=65)</b>      | NT       | Yes                                                            | No       | NA     |         |
| Venereal diseases                           | 41(63.1) | 22(53.7)                                                       | 18(43.9) | 1(2.4) | 0.004   |
| Significant lower abdominal pain            | 41(63.1) | 23(56.1)                                                       | 17(41.5) | 1(2.4) | 0.002   |
| Hematuria                                   | 41(63.1) | 24(58.5)                                                       | 16(39.1) | 1(2.4) | 0.007   |
| Dysuria                                     | 33(50.8) | 20(60.6)                                                       | 12(36.4) | 1(3.0) | 0.010   |
| Use praziquantel to treat venereal diseases | 24(36.9) | 21(87.5)                                                       | 3(12.5)  | 0(0)   | 0.000   |

242 N: Number of practitioners recruited; NT: Number of practitioners who treat one form of  
 243 clinical condition; p-value is significant at 0.05

244

#### 245 **Management of FGS patients during routine health care service**

246 About half of the practitioners were uncertain whether, or not they should quarantine patients

247 with FGS. Similarly, only 28% of the practitioners affirmed that praziquantel is the only drug

248 of choice for treating FGS (Table 3). A considerable proportion (39%) of them were uncertain

249 if they were to treat pregnant women, and when to treat them during the pregnancy stage. In

250 addition, about 35% of them do not know that the dosage of praziquantel varies across age

251 categories (Table 3). Commodities for managing FGS were largely unavailable (39%) in the

252 workplaces of the practitioners. However, about 29% reported having access to praziquantel

253 in their workplace, while 20% reported having both praziquantel and schistosomiasis

254 detection kits or urinalysis test strips and 11% reported having only test strips (Fig 4).

255 *Fig 4: Availability of commodities at health care centers for FGS patients*

256

257 **Table 3:** Knowledge about the management of FGS patients during routine healthcare

258 service

| N=65                                                               | Frequency | %    |
|--------------------------------------------------------------------|-----------|------|
| <b>Persons affected with FGS should be quarantined.</b>            |           |      |
| Yes                                                                | 1         | 1.5  |
| No                                                                 | 37        | 56.9 |
| Don't know                                                         | 20        | 30.8 |
| Maybe                                                              | 7         | 10.8 |
| <b>Praziquantel is the only treatment for FGS.</b>                 |           |      |
| Yes                                                                | 18        | 27.7 |
| No                                                                 | 22        | 33.8 |
| I don't know                                                       | 25        | 38.5 |
| <b>Praziquantel can be used to treat pregnant women.</b>           |           |      |
| Yes                                                                | 40        | 61.5 |
| No                                                                 | 25        | 38.5 |
| <b>In which trimester can pregnant women take praziquantel?</b>    |           |      |
| First                                                              | 2         | 3.1  |
| Second                                                             | 10        | 15.4 |
| Third                                                              | 22        | 33.8 |
| All                                                                | 18        | 27.7 |
| None                                                               | 13        | 20.0 |
| <b>The praziquantel dosage is the same for adults and children</b> |           |      |
| Yes                                                                | 5         | 7.7  |
| No                                                                 | 43        | 66.2 |
| I don't know                                                       | 17        | 26.2 |

259

260

261 **Participants' experiences during routine healthcare service on FGS-related symptoms**

262 **Of the eighty-three residents who presented a case of painful urination to the health care**

263 **center, only 22 (26.5%) of them were asked if they had recent contact with fresh water bodies.**



264 This is similar to 12 (38.7%) of the 31 residents who presented hematuria, 44 (23.5%) of 187  
 265 who presented lower abdominal pain, and 31 (37.3%) of the 83 residents who presented  
 266 venereal diseases (Table 5).

267

268 **Table 5: Participants' experiences during routine health care service on FGS-related**  
 269 **symptoms**

| Presented symptoms   | The practitioner asked about recent contact with freshwater |           |            | p-value |
|----------------------|-------------------------------------------------------------|-----------|------------|---------|
|                      | NE                                                          | Yes       | No         |         |
| Painful urination    | 83                                                          | 22 (26.5) | 61 (73.5)  | 0.458   |
| Hematuria            | 31                                                          | 12 (38.7) | 19 (61.3)  | 0.035   |
| Lower abdominal pain | 187                                                         | 44 (23.5) | 143 (76.5) | 0.786   |
| Venereal diseases    | 83                                                          | 31 (37.3) | 52 (62.7)  | 0.000   |

270 p-value is significant at 0.05

271

## 272 Discussion

273 Schistosomiasis has been largely studied in Nigeria [17][18], and a network of partnerships  
 274 between national and international agencies has invested commendable resources to control  
 275 the menace of the disease [19][20]. In 2019, about 250 praziquantel tablets were administered  
 276 in endemic communities, with the sole beneficiaries being children under age 15 [1]. Until  
 277 recent, adults, most especially females of reproductive age (>15 years) have been largely  
 278 neglected in schistosomiasis control programs [21], owing to the premise that mass  
 279 administration of praziquantel to children under 15 is sufficient to reduce the burden of  
 280 schistosomiasis in an endemic setting [22]. Unfortunately, women living in endemic regions  
 281 could acquire *S. haematobium* infection in childhood [16][23][24], which may develop into  
 282 female genital schistosomiasis (FGS) when left untreated [21][15][5][7]. The clinical  
 283 manifestations and consequences of FGS, on both the sexual and reproductive health of

284 females, have been extensively described [8], and in recent times have gained public health  
285 traction [25].

286

287 However, despite the fact that FGS affects about 56 million women and girls in Africa, with  
288 about 20 to 150 million females estimated to be at risk, the disease remains largely neglected  
289 [13]. This is partly because the clinical manifestations are often misdiagnosed and confused  
290 with those of other sexually transmitted infections (STIs) [26], which in most cases do not  
291 only lead to undertreatment of genuine FGS cases but also stigmatization, mental stress, social  
292 exclusion and impaired life quality among young females who are wrongly misdiagnosed to  
293 have STIs [12][26]. Efforts targeted at addressing this capacity gap, most especially among  
294 healthcare professionals are emerging, for example with the FAST package implemented in  
295 some of Ghana and Madagascar [27] and other capacity-building workshops organized by  
296 Bridges to Development [28]. In this study, we, therefore, characterized the profiles of the  
297 university students vis-a-vis their knowledge and awareness about FGS, since they are most  
298 likely to take on healthcare-related jobs in the subsequent future. In addition, we assessed the  
299 expertise and challenges of healthcare professionals that are currently engaged in  
300 schistosomiasis control activities as a precursor to developing interventions to support the  
301 control of FGS.

302

303 Firstly, our findings revealed poor knowledge and awareness about schistosomiasis and FGS  
304 among university students, with a majority of those that have heard about the disease  
305 attributing the source of information to the school environment and social media. This  
306 reiterates the importance of incorporating FGS-related material into the medical training  
307 curricula of university students [25]. The potential of social media and radio programmes in  
308 promoting health-educational messages have been reported elsewhere [29][30] and can be

309 explored in this context to promote FGS. Similarly, we observed a contrastingly high  
310 awareness of schistosomiasis, but low awareness of FGS among healthcare professionals  
311 which is in line with previous reports [25][31]. A considerable proportion of our respondents  
312 attributed the cause of FGS to contact with water bodies and sexual intercourse, while only a  
313 few (2.5%) claimed it is a result of untreated *Schistosoma* infection. The misconception that  
314 FGS is transmitted via sexual intercourse needs to be addressed as it could have far-reaching  
315 implications on the socioeconomic life of affected women. It should therefore be advocated  
316 that FGS is a consequence of embedded *S. haematobium* eggs, DNA, or in the genital tract of  
317 affected women [5][6], and the condition is directly related to exposure to infected  
318 waterbodies harboring the *Bulinus* spp. More importantly, about 40% of the health care  
319 professionals claimed they had never suspected FGS among patients who reported venereal  
320 infections, lower abdominal pain, hematuria, and dysuria. Largely, 60-70% of the female  
321 residents also affirmed that healthcare professionals had never asked them about their history  
322 of contact with rivers when they presented symptoms such as painful urination, hematuria,  
323 lower abdominal pain, and venereal diseases to the clinic. The management of FGS was poor  
324 among the health care professionals, as a considerable proportion do not know the drug of  
325 choice for FGS, and the dosage requirement for treating adults, children, and pregnant women.  
326 This lack of awareness about FGS among healthcare workers has been reported elsewhere  
327 [25][31][15] and coupled with the lack of commodities including praziquantel tablets, Kato  
328 Katz kits, urine filtration kits, and materials for colposcopy are the reasons why FGS remains  
329 a misunderstood and neglected disease. It is therefore important to complement discussion  
330 around increasing awareness and knowledge of health care professionals, with considerable  
331 investments and provision of adequate commodities for detecting and treating schistosomiasis  
332 and FGS.

333

334 Summarily, the lack of knowledge and expertise, among health care providers to appropriately  
335 diagnose FGS has resulted in under or misdiagnosis of the clinical conditions, hence, limiting  
336 access to treatment for women and girls suffering from this preventable and treatable disease.  
337 It is therefore important to consider interventions targeted at improving healthcare workers'  
338 knowledge by incorporating FGS-related material into medical training curricula [25] or more  
339 routinely into ongoing schistosomiasis control programme which are implemented at sub-  
340 district levels in endemic countries. The latter approach would allow wider coverage to the  
341 already engaged local health workforce within implementation units where the disease is most  
342 endemic. As previously highlighted by Jacobson, [25], this step would require identifying a  
343 clear and standardized set of learning outcomes; specifically, the competencies or behaviors  
344 required to adequately prevent, diagnose, and manage an FGS case. It is, therefore, significant  
345 to highlight that currently developed tools can be adapted for local pilot among healthcare  
346 professionals in the study area, to improve health workforce capacity and contribute to  
347 alleviating the neglect of FGS.

348

### 349 **Conclusion**

350 Our study has highlighted the significant lack of awareness and knowledge about FGS among  
351 university students and healthcare professionals in one of the southeastern states of Nigeria  
352 where the FGS burden has been previously mapped. In addition, we have highlighted the  
353 resultant effect of these gaps on underdiagnosis, misdiagnosis, and/or lack of or inappropriate  
354 treatment for FGS contributing to poor reproductive health outcomes in endemic areas. It is  
355 therefore important to develop and incorporate FGS training materials in training curricula of  
356 university students and training programs of health professionals during routine ongoing  
357 schistosomiasis control programs which have a wider coverage of engaged local health  
358 workforce within implementation units where the disease is most endemic.

359 **Limitations of the study**

360 This study was conducted during the COVID-19 pandemic with considerable restrictions on  
361 movements, hence we employed an electronic mode of data collection for undergraduate  
362 students recruited from public and government-owned tertiary institutions. In addition, we  
363 assessed participants' knowledge about schistosomiasis and FGS using a binary outcome,  
364 hence we cannot ascertain if respondents know the true definitions and conditions of the  
365 diseases.

366

367 **Acknowledgments**

368 We are grateful to the participants for their support. Our profound gratitude goes to the Geneva  
369 Learning Foundation for their collaboration in this study.

370

371 **Declarations**

372

373 **Consent for publication**

374 Not applicable

375

376 **Availability of data and materials**

377 The datasets used and/or analyzed during the current study have been attached as  
378 supplementary files.

379

380 **Competing interests**

381 The authors declare that they have no competing interest

382

383 **Funding**

384 Not applicable

385

386 **Authors' contribution**

387 OBA conceptualized the study. OBA, NOA, and ECJ prepared the protocol, while HOM,

388 OAS, EMO, ON, and JJ improved the protocol. OBA, NOA, and ECJ participated in field  
389 surveys and data collection. OBA, HOM, and OAS performed all statistical analyses and also  
390 prepared the first draft of the manuscript. All authors contributed to the development of the  
391 final manuscript and approved its submission.  
392

393 **REFERENCES**

394

- 395 1. World Health Organization, “Ending the neglect to attain the Sustainable  
396 Development Goals: a road map for neglected tropical diseases 2021–2030,” Geneva:  
397 World Health Organization, 2020. Licence: CC BY-NC-SA 3.0 IGO.
- 398 2. Colley DG, Bustinduy AL, Secor WE, King CH. Human schistosomiasis. *Lancet*  
399 (*London, England*), 2014; 383(9936): 2253–2264. [https://doi.org/10.1016/S0140-  
400 6736\(13\)61949-2](https://doi.org/10.1016/S0140-6736(13)61949-2).
- 401 3. World Health Organization, “Schistosomiasis,” *World Health Organization*, 2021.  
402 [Online]. Available: [https://www.who.int/news-room/fact-  
403 sheets/detail/schistosomiasis](https://www.who.int/news-room/factsheets/detail/schistosomiasis). Accessed 20 September 2021.
- 404 4. Jose RL. Acute schistosomiasis mansoni: revisited and reconsidered. *Mem Inst*  
405 *Oswaldo Cruz, Rio de Janeiro*, 2010; 105(4):422-435. doi.org/10.1590/S0074-  
406 02762010000400012.
- 407 5. Kjetland EF, Ndhlovu PD, Mduluza T, Gomo E, Gwanzura L, Mason PR, et al.  
408 Simple clinical manifestations of genital *Schistosoma haematobium* infection in rural  
409 Zimbabwean women. *Am J Trop Med Hyg*, 2005; 72(3): 311-319.
- 410 6. Kjetland EF, Poggensee G, Helling-Giese G, Richter J, Sjaastad A, Chitsulo L, et al.  
411 Female genital schistosomiasis due to *Schistosoma haematobium*. Clinical and  
412 parasitological findings in women in rural Malawi. *Acta Trop*, 1996; 62(4): 239-255.
- 413 7. Leutscher P, Ravaoalimalala VE, Raharisolo C, Ramarokoto CE, Rasendramino M,  
414 Raobelison A, et al. Clinical findings in female genital schistosomiasis in Madagascar.  
415 *Trop Med Int Health*, 1998; 3(4): 327-332.
- 416 8. Sturt AS, Webb EL, Francis SC, Hayes RJ, Bustinduy AL. Beyond the barrier: Female  
417 Genital Schistosomiasis as a potential risk factor for HIV-1 acquisition. *Acta Tropica*,  
418 2020; 209(105524): <https://doi.org/10.1016/j.actatropica.2020.105524>.
- 419 9. Hegertun IEA, Sulheim GKM, Kleppa E, Zulu SG, Gundersen SG, Taylor M, et al. *S.*  
420 *haematobium* as a Common Cause of Genital Morbidity in Girls: Cross-sectional  
421 Study of Children in South Africa. *PLoS Neglected Tropical Diseases*, 2013; 7(3):  
422 e2104. <https://doi.org/10.1371/journal.pntd.0002104>.
- 423 10. Helling-Giese G, Kjetland EF, Gundersen SG, Poggensee G, Richter J, Krantz I,  
424 Feldmeier H. Schistosomiasis in women: manifestations in the upper reproductive  
425 tract. *Acta Trop*, 1996; 62(4): 225-238.

- 426 11. Swai B, Poggensee G, Mtweve S, Krantz I. Female genital schistosomiasis as evidence  
427 of a neglected cause for reproductive ill-health: a retrospective histopathological study  
428 from Tanzania. *BMC Infect Dis*, 2006; 6: 134.
- 429 12. Engels D, Hotez PJ, Ducker C, Gyapong M, Bustinduy AL, Secor WE, et al.  
430 Integration of prevention and control measures for female genital schistosomiasis,  
431 HIV and cervical cancer. *Bulletin for World Health Organisation*, 2020; 98(9): 615–  
432 624. 10.2471/BLT.20.252270.
- 433 13. Kukula VA, MacPherson EE, Tsey IH, Stothard JR, Theobald S, Gyapong M. A major  
434 hurdle in the elimination of urogenital schistosomiasis revealed: Identifying key gaps  
435 in knowledge and understanding of female genital schistosomiasis within communities  
436 and local health workers. *PLoS Negl Trop Dis*, 2019; 13(3): e0007207.  
437 <https://doi.org/10.1371/journal.pntd.0007207>.
- 438 14. Aribodor, OB. “Sneglefeber: Overset sygdom plager millioner af kvinder,”  
439 *Forskerzonen*, 2022. [Online]. Available: [https://videnskab.dk/forskerzonen/krop-  
440 sundhed/sneglefeber-overset-sygdom-plager-millioner-af-kvinder](https://videnskab.dk/forskerzonen/krop-sundhed/sneglefeber-overset-sygdom-plager-millioner-af-kvinder)
- 441 15. Ekpo U, Odeyemi O, Sam-Wobo S, Onunkwor O, Mogaji H, Oluwole A, Abdussalam,  
442 HO, Stothard JR. Female genital schistosomiasis (FGS) in Ogun State, Nigeria: a pilot  
443 survey on genital symptoms and clinical findings. *Parasitology Open*, 2017; 3: E10:  
444 1-9.
- 445 16. Aribodor OB, Okaka CE, Sam-Wobo SO, Okpala BC, Aribodor DN, Obikwelu E.  
446 Urinary Schistosomiasis and Primary Evidence of Female Genital Schistosomiasis  
447 among Pupils in Nsugbe Community, Anambra State, Nigeria. *Nigerian Journal of*  
448 *Parasitology*, 2021; 42(2): 294-402. 10.4314/njpar.v42i2.26.
- 449 17. Oyeyemi OT, Jeremias WJ, Grenfell RFQ. Schistosomiasis in Nigeria: Gleaning from  
450 the past to improve current efforts towards control. *One Health*, 2020; 11:100183. doi:  
451 10.1016/j.onehlt.2020.100183.
- 452 18. Ezeh CO, Onyekwelu KC, Akinwale OP, Shan L, Wei H. Urinary schistosomiasis in  
453 Nigeria: a 50-year review of prevalence, distribution and disease burden. *Parasite*,  
454 2019; 26:19. <https://doi.org/10.1051/parasite/2019020>
- 455 19. ESPEN, 2022. <https://espen.afro.who.int/>
- 456 20. Federal Ministry of Health (FMoH). Neglected Tropical Diseases Master Plan 2015–



2020. [Accessed: 15 January 2021]. Available at  
[https://espen.afro.who.int/system/files/content/resources/NIGERIA\\_NTD\\_Master\\_Plan\\_2015\\_2020.pdf](https://espen.afro.who.int/system/files/content/resources/NIGERIA_NTD_Master_Plan_2015_2020.pdf).
21. Mishra P, Colombe S, Paul N, Mlingi J, Tosiri I, Aristide C, et al. Insufficiency of annual praziquantel treatment to control *Schistosoma mansoni* infections in adult women: A longitudinal cohort study in rural Tanzania. *PLoS Negl Trop Dis*, 2019; 13(11): e0007844, <https://doi.org/10.1371/journal.pntd.0007844>
22. World Health Organization, "Helminth control in school-age children: a guide for managers of control programmes," 2011. [Online]. Available: [https://www.who.int/neglected\\_diseases/resources/9789241548267/en/](https://www.who.int/neglected_diseases/resources/9789241548267/en/) [Accessed 15 April 2021].
23. Verani JR, Abudho B, Montgomery SP, Mwinzi PN, Shane HL, Butler SE, et al. Schistosomiasis among young children in Usoma, Kenya. *Ame J of Trop Med Hyg*, 2011; 84(5):787–791. <https://doi.org/10.4269/ajtmh.2011.10-0685>
24. Ekpo UF, Laja-Deile A, Oluwole AS, et al. Urinary schistosomiasis among preschool children in a rural community near Abeokuta. Nigeria. *Parasites Vectors*, 2010; 3, 58. <https://doi.org/10.1186/1756-3305-3-58>
25. Jacobson J, Pantelias A, Williamson M, Kjetland EF, Krentel A, Gyapong M, et al. Addressing a silent and neglected scourge in sexual and reproductive health in Sub-Saharan Africa by development of training competencies to improve prevention, diagnosis, and treatment of female genital schistosomiasis (FGS) for health workers. *Reprod Health*, 2022; 19:20. <https://doi.org/10.1186/s12978-021-01252-2>
26. Hotez PJ, Harrison W, Fenwick A, Bustinduy AL, Ducker C, Mbabazi PS, et al. Female genital schistosomiasis and HIV/AIDS: Reversing the neglect of girls and women. *PLoS Negl Trop Dis*, 13(4):e0007025.
27. "FAST Package - Dedicated to Combatting FGS," 2022. [Online]. Available: <https://fastpackage.org/>. [Accessed 23 June 2022].
28. Bridges to Development, "Advancing resilient communities on a path towards sustainable development," Bridges to Development, 2022. [Online]. Available: <https://bridgestodevelopment.org>. [Accessed 23 June 2021]
29. Mogaji HO, Odoh IM, Iyeh CI, Adeniran AA, Oyedeji SI, Okoh HI, et al. Attendee's awareness about preventive chemotherapy neglected tropical diseases (PC-NTD) control during the first world neglected tropical diseases day in Ekiti State, Nigeria.

- 490 PLoS Negl Trop Dis, 2021; 15(3): e0009315.  
491 <https://doi.org/10.1371/journal.pntd.0009315>
- 492 30. Advocacy partnership. TB/MDR-TB Advocacy Tool Kit. [Online]. 2012. Available at  
493 [http://www.stoptb.org/assets/documents/global/awards/cfcs/tb\\_mdr%20advocacy%20tool%20kit.pdf](http://www.stoptb.org/assets/documents/global/awards/cfcs/tb_mdr%20advocacy%20tool%20kit.pdf).  
494
- 495 31. Bustinduy AL, Randriansolo B, Sturt AS, Kayuni SA, Leutscher PDC, Webster BL,  
496 et al. An update on female and male genital schistosomiasis and a call to integrate  
497 efforts to escalate diagnosis, treatment and awareness in endemic and non-endemic  
498 settings: The time is now. *Advances in Parasitology*, 2022; 115:1-44.  
499 <https://doi.org/10.1016/bs.apar.2021.12.003>.
- 500

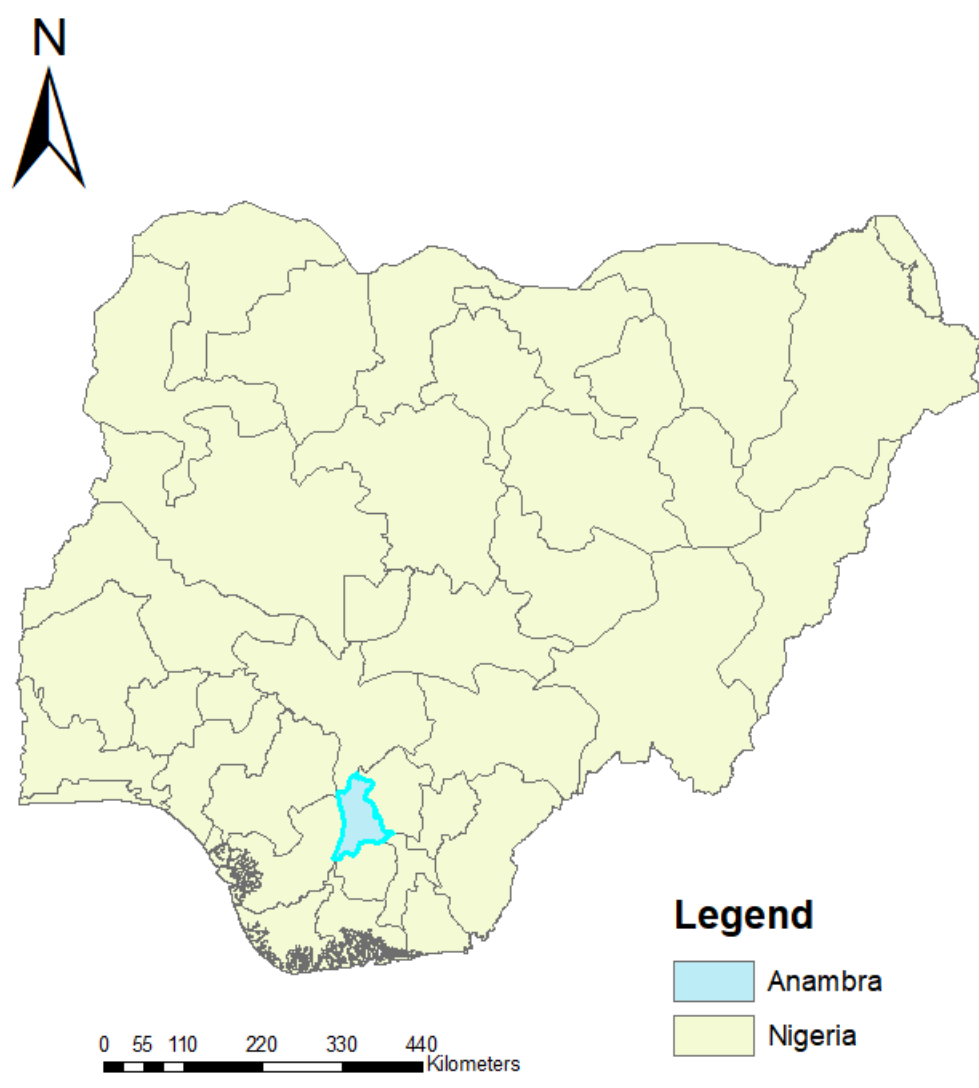

**Figure 1: Map of Nigeria showing Anambra State**

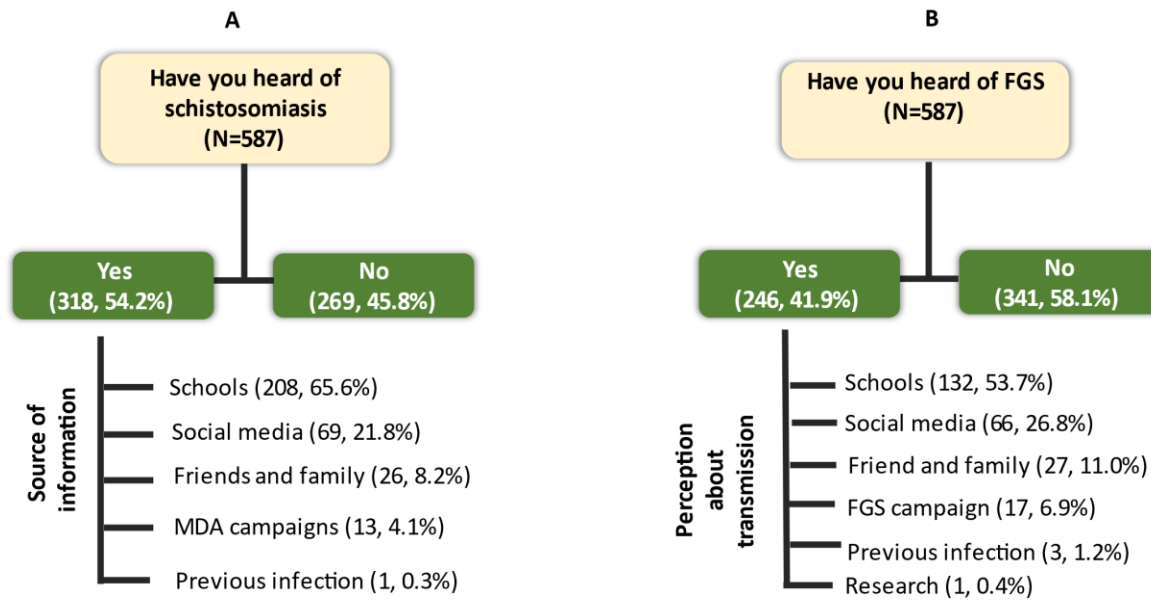

**Figure 2:** Awareness of schistosomiasis and FGS among university students

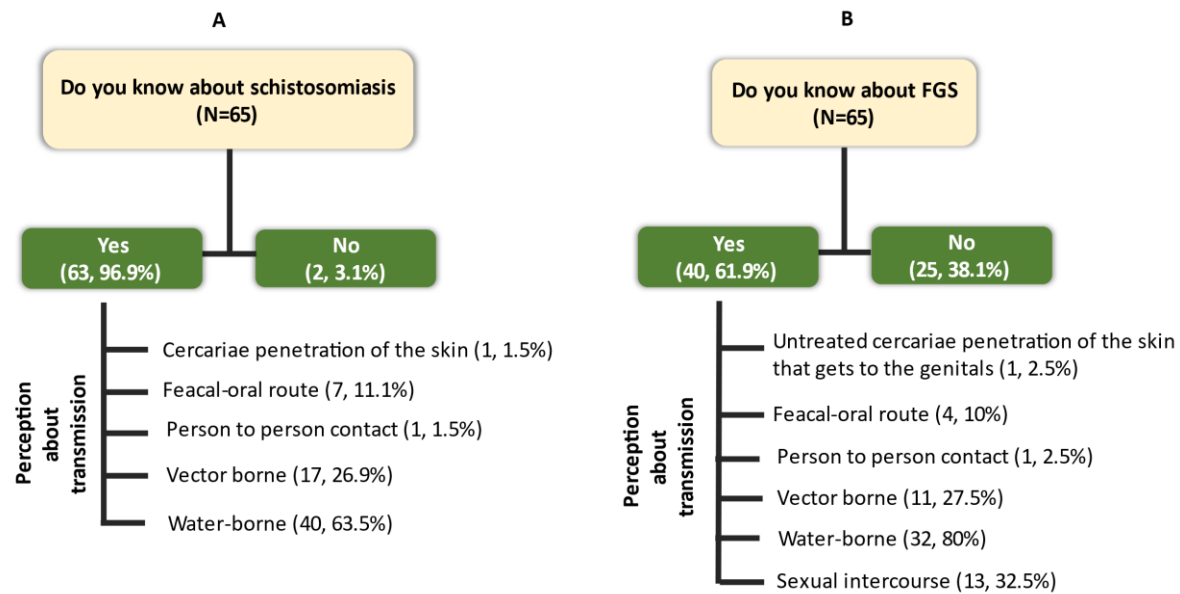

**Figure 3: Knowledge of health care professionals about schistosomiasis and FGS.**

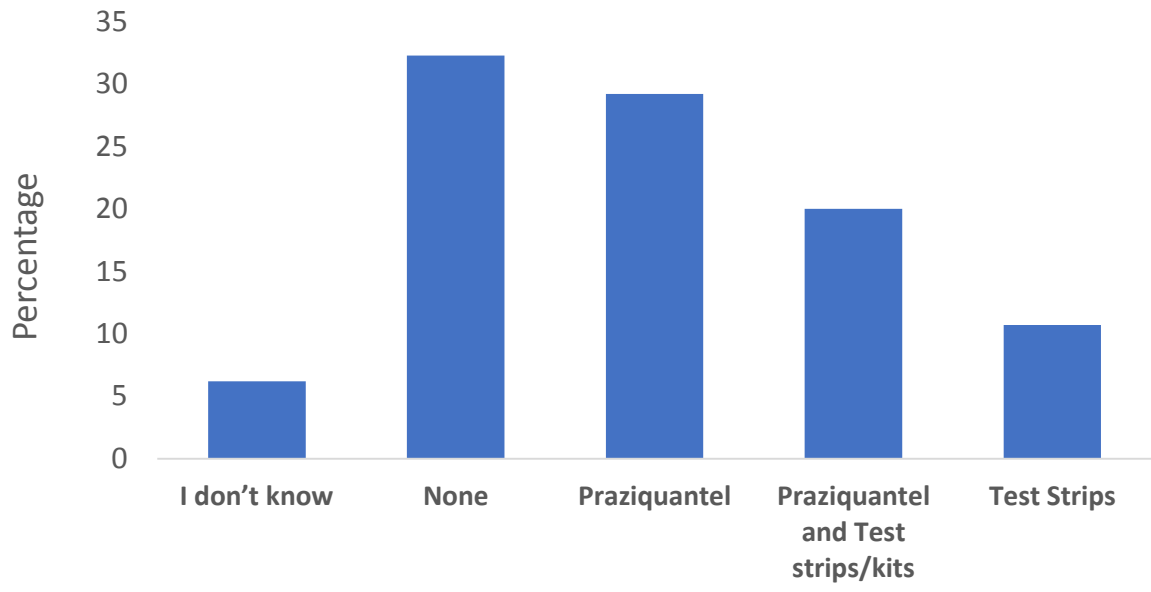

**Figure 4:** Availability of commodities at health care centers for FGS patients

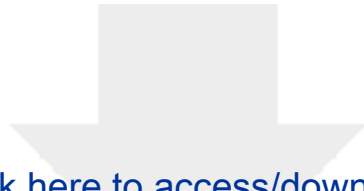

[Click here to access/download](#)

**Supporting Information**

**S1 FGS Schistomiasis Raw Data.xlsx**

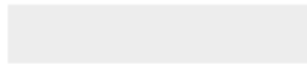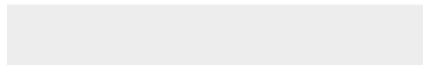

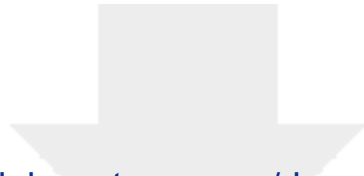

Click here to access/download  
**Supporting Information**  
S2 Healthworkers (Responses).xlsx

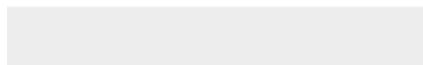





Click here to access/download

**Supporting Information**

**S3 ETHICAL APPROVAL .jpg**

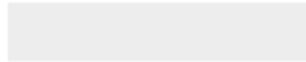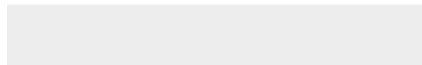



Click here to access/download  
**Supporting Information**  
S3 APPROVAL 2.pdf

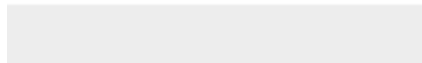

Supplement: pntd.0011132.s003.pdf [file pntd.0011132.s003.pdf]
